# Supplementary material for: The impact of chronic pain on brain gene expression
Source: bioRxiv or medRxiv preprint supplement (doi:10.1101/2024.05.20.24307630), 2024-05-21
Supplement: Supplementary file [file media-1.pdf]

## Cell-type deconvolution with an alternate reference dataset

We repeated cell type deconvolution of expression data from our bulk tissue samples with CIBERSORTx<sup>1</sup>, using an alternate reference dataset downloaded from Gene Expression Omnibus<sup>2</sup> (Series GSE195445) and associated with a set of RNA-seq experiments using amygdala samples only<sup>3</sup>. First the Yu et al human dataset Seurat<sup>4</sup> object was processed to produce the files required for CIBERSORTx web application signature matrix generation step (columns of samples and rows of genes, with expression values expressed in TPM). Conversion to TPM using DGEobj.utils function ‘convertCounts’ requires gene lengths, which were obtained using biomaRt<sup>5</sup> and querying using gene symbols (‘external\_gene\_name’) to find start and end positions of each gene. This produced a reference expression dataset for 15,387 genes from three human donors, each with seven cell types tested (astrocytes, endothelial cells, excitatory neurons, inhibitory neurons, microglia, oligodendrocytes, and oligodendrocyte progenitor cells). Then we performed CIBERSORTx step 2, using the generated signature matrix and Girgenti et al postmortem bulk tissue expression data in TPM. We then calculated the mean cell type proportion for each brain region, and compared this with cell type proportion means using our previous reference data set as described in the main manuscript.

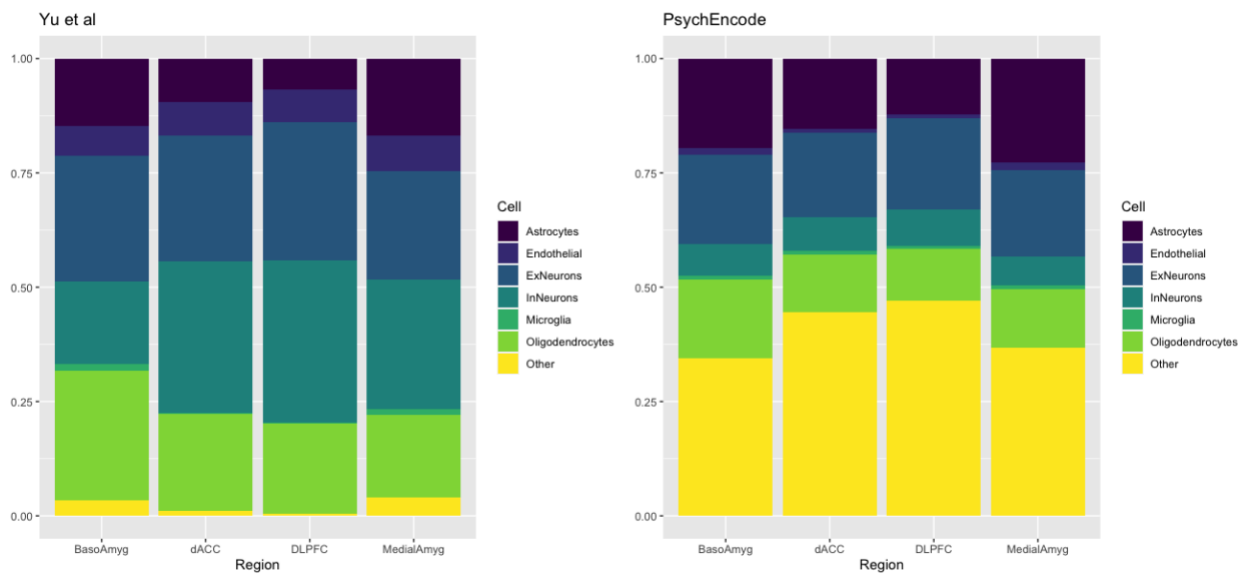

Cell type proportions across the four brain regions following cell-type expression imputation using amygdala (Yu et al) and cortex (psychENCODE) reference panels. Note: ‘Other’ in Yu et al is OPC, in PsychEncode ‘Neurons’.

Significant differences in cell type proportions are seen, particularly in overall neuron content. We opted to impute cell type level expression data in cortical and amygdala bulk data separately using the two distinct reference data sets (psychENCODE cortical samples for dACC and DLPFC, and Yu et al amygdala samples for MeA and BLA).

### **Additional DEG analysis multiple-testing correction**

We consider the five separate sets (PRS, oxymorphone, fentanyl, chronic pain, and migraine) of DEG analyses not to require additional cross-experiment multiple testing correction, i.e., multiple testing correction as described in the main manuscript is sufficient. However, we applied an additional, even more stringent DEG regression p value threshold ( $0.05 / \text{number of genes tested within that tissue and cell type} / 5$  (number of traits in total across entire study)). While this does reduce the number of significant DEGs identified, a t-test comparing N DEGs at the original p value threshold vs. additional correction threshold  $p = 0.49$ , and in particular the main bulk of our chronic pain findings remain in the BLA microglia (original p value threshold N DEG in BLA microglia: 1810 (77% of all chronic pain DEGs), with additional correction: 1260 (82%)).

### **FUMA gene-set enrichment p value threshold**

In order to calculate a Bonferroni-adjusted p value threshold we downloaded the entirety of the gene sets used in the latest version of FUMA GENE2FUNC from the FUMA website 'GENE2FUNC\_genesets\_v156plus.tar.gz'. We then removed duplicated gene sets and sets that were nested (gene sets for FUMA are sourced from MSigDB <sup>6</sup> and all are included despite e.g., certain sets being repeated due to their classification as both a canonical pathway and a reactome pathway (child category of canonical pathway)). This results in a total of 32,584 independent gene sets and therefore a Bonferroni p value threshold of  $0.05/32,584$  within each tissue-cell type gene-set enrichment (pathway) analysis.

### **DEGs in Oligodendrocyte Progenitor Cells (OPCs)**

We find 18 significant ( $P_{\text{Bonferroni}} < 0.05$ ) chronic pain DEGs, 47 fentanyl DEGs, 1 oxymorphone DEG, 3 migraine DEGs, and 0 PRS-DEGs in MeA OPCs. We find 4 significant chronic pain DEGs, 64 fentanyl DEGs, 3 oxymorphone DEGs, 0 migraine DEGs, and 0 PRS-DEGs in BLA OPCs.

Medial Amygdala (MedialAmyg)

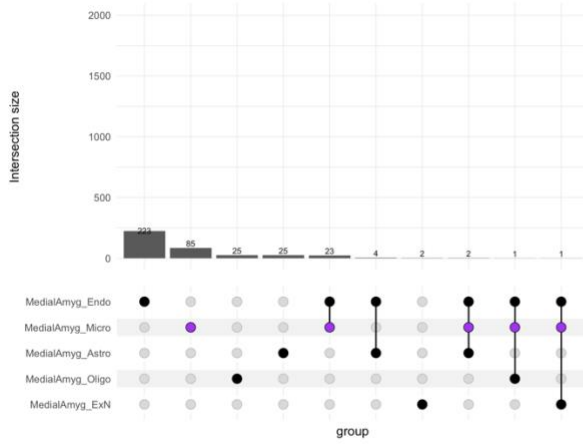

Basolateral Amygdala (BasoAmyg)

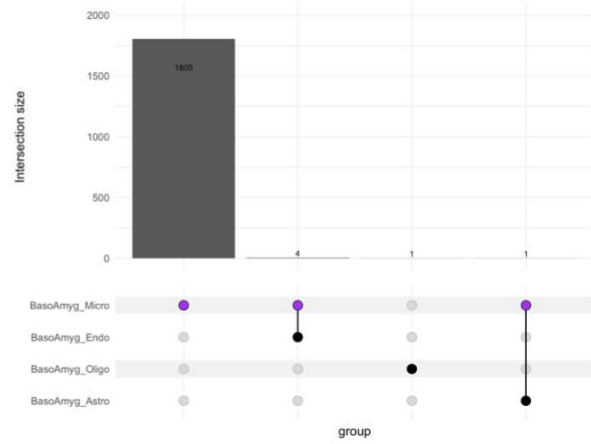

Dorsal Anterior Cingulate Cortex (dACC)

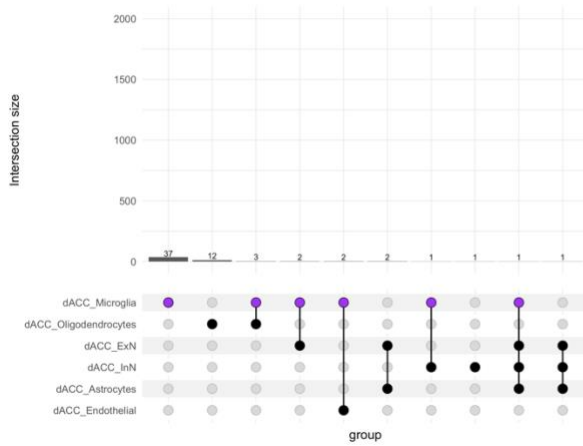

Dorsolateral Prefrontal Cortex (DLPFC)

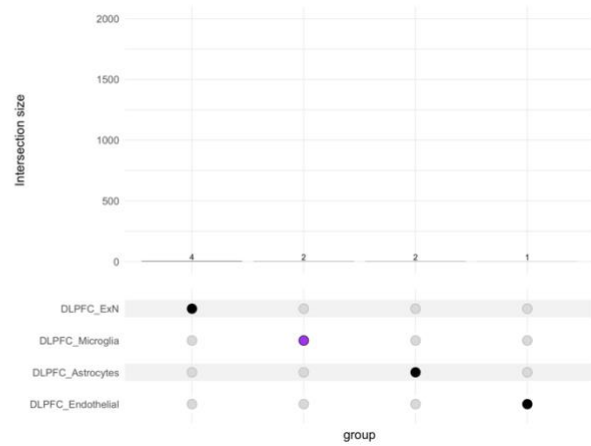

**Fig S1: Cell type DEGs in chronic pain – comparison across regions and cell types. Majority of findings are in BLA microglia, and number of DEGs shared between cell types is low.**

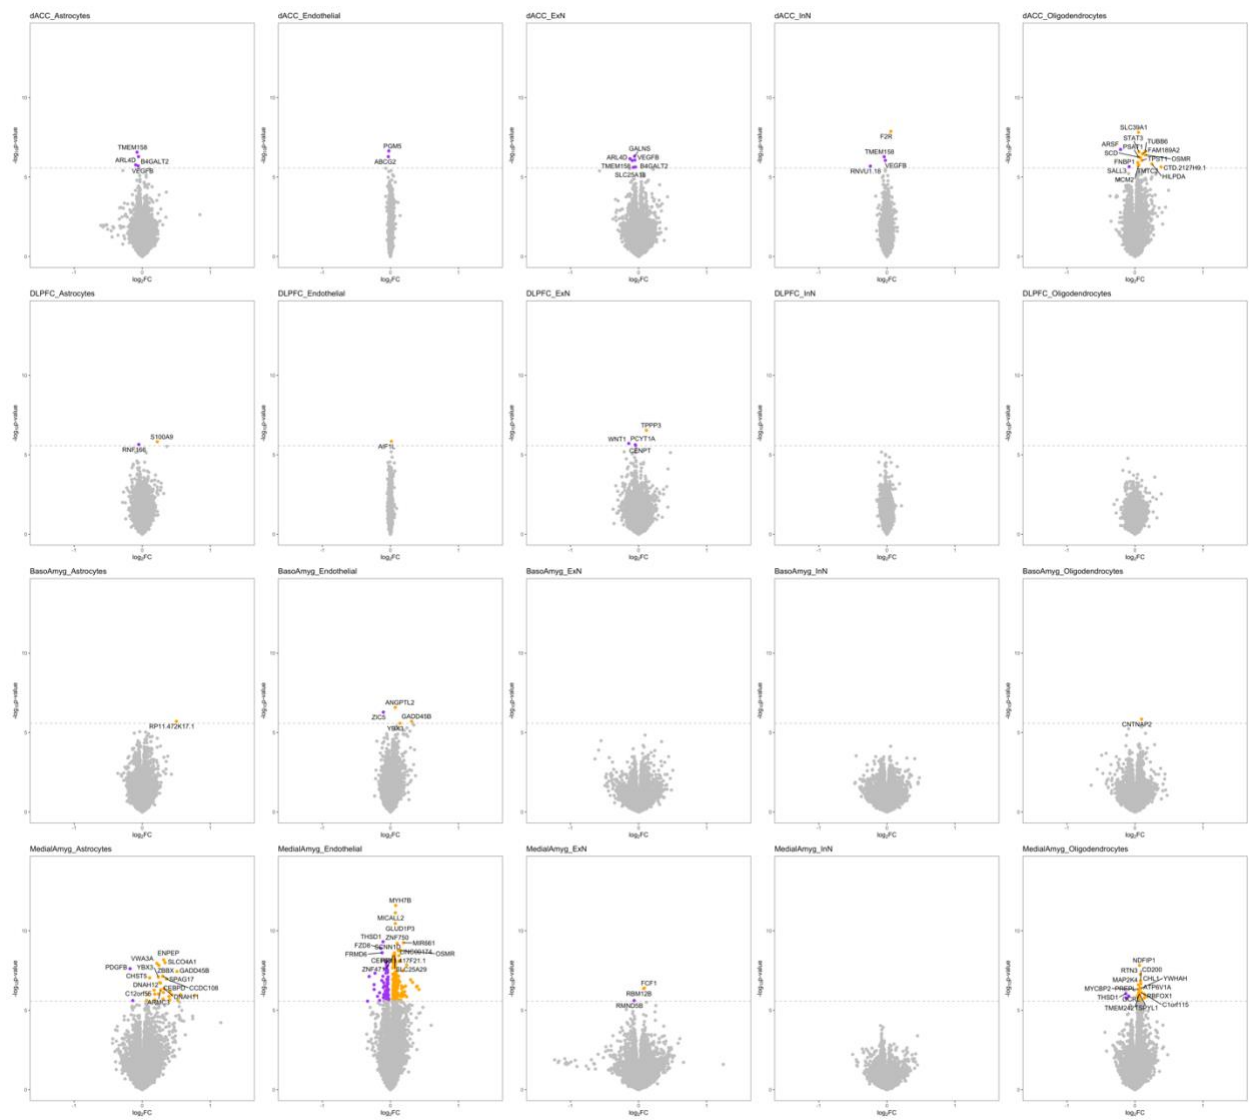

**Fig S2: Additional genes differentially expressed across cell types in chronic pain.** Chronic pain cell type DEGs in cell types per region. Purple = significantly ( $P_{\text{Bonferroni}} < 0.05$ ) downregulated, orange = significantly ( $P_{\text{Bonferroni}} < 0.05$ ) upregulated, dotted line = p value significance threshold. For legibility only the top 15 DEGs are labeled. FC = fold change. InN = inhibitory neuron, ExN = excitatory neuron.

**Table S1: DEG analyses per-gene regression models.** BLA = Basolateral Amygdala, MeA = Medial Amygdala, InN = inhibitory neuron, ExN = excitatory neuron, dACC = dorsal anterior cingulate cortex, DLPFC = dorsolateral prefrontal cortex, SV = surrogate variable, model = DEG regression model fitted per gene. In model column; ‘gene’ = gene expression value, ‘trait’ = trait value (case/control, yes/no for oxymorphone lifetime use, fentanyl lifetime use, migraine, chronic pain, quantitative MCP-PRS value for PRS).

| Trait        | Analysis type | Region | Cell             | N SVs            | model                                                                                                                        |                                                                                                                                                                |
|--------------|---------------|--------|------------------|------------------|------------------------------------------------------------------------------------------------------------------------------|----------------------------------------------------------------------------------------------------------------------------------------------------------------|
| Chronic Pain | Bulk          | DLPFC  | NA               | 22               | gene ~ trait + SVs + Handedness + Migraine + Amphetamines                                                                    |                                                                                                                                                                |
|              |               | dACC   | NA               | 21               | gene ~ trait + SVs + Handedness + Tramadol + Amphetamines + Ketamine + Anticholinergics..An tiparkinsonians + personal count |                                                                                                                                                                |
|              |               | BLA    | NA               | 25               | gene ~ trait + SVs + Manner_of_death_Suicide + Delta.9.THC.Active + Barbiturates + witness any                               |                                                                                                                                                                |
|              |               | MeA    | NA               | 27               | gene ~ trait + SVs + PTSD_PrimaryDx + Barbiturates + personal count                                                          |                                                                                                                                                                |
|              | Cell-type     | BLA    | InN              | InN              | 53                                                                                                                           | gene ~ trait + SVs + Acetone + Cocaethylene + Benzoylcegonine_mg_L_blood + Hydrocodone + Ketamine + Anticholinergics..An tiparkinsonians + Hallucinogens + ECT |
|              |               |        | ExN              | ExN              | 43                                                                                                                           | gene ~ trait + SVs + Isopropanol + Famhx.Suicide + combat only count                                                                                           |
|              |               |        | Oligodendrocytes | Oligodendrocytes | 44                                                                                                                           | gene ~ trait + SVs + X11.Hydroxy.Delta.9.THC.Active + Amphetamines + Barbiturates + Ketamine + personal any                                                    |
|              |               |        | Endothelial      | Endothelial      | 38                                                                                                                           | gene ~ trait + SVs + Race + BMI..calculated. + X11.Hydroxy.Delta.9.THC.Active + Barbiturates + disaster_count + assault count                                  |
|              |               |        | Astrocytes       | Astrocytes       | 49                                                                                                                           | gene ~ trait + SVs + Isopropanol + X6.AM + Tramadol +                                                                                                          |

|  |  |       |                  |    |                                                                                                                                                                                                                                                                        |
|--|--|-------|------------------|----|------------------------------------------------------------------------------------------------------------------------------------------------------------------------------------------------------------------------------------------------------------------------|
|  |  |       |                  |    | Anticholinergics..An<br>tiparkinsonians +<br>Hallucinogens +<br>EA_UA_neglect_co<br>unt +<br>personal count                                                                                                                                                            |
|  |  |       | Microglia        | 28 | gene ~ trait + SVs +<br>Handedness +<br>BMI..calculated. +<br>Isopropanol +<br>X11.Hydroxy.Delta.<br>9.THC.Active +<br>Benzoyllecgonine +<br>Barbiturates +<br>Ketamine +<br>Anticholinergics..An<br>tiparkinsonians +<br>Hallucinogens +<br>SA_count +<br>witness any |
|  |  | dACC  | InN              | 39 | gene ~ trait + SVs                                                                                                                                                                                                                                                     |
|  |  |       | ExN              | 40 | gene ~ trait + SVs +<br>Cocaethylene +<br>Amphetamines +<br>childhood count                                                                                                                                                                                            |
|  |  |       | Oligodendrocytes | 55 | gene ~ trait + SVs +<br>Cocaethylene +<br>Benzoyllecgonine_m<br>g_L_blood +<br>Nicotine_ng_mL +<br>Barbiturates +<br>Anticholinergics..An<br>tiparkinsonians                                                                                                           |
|  |  |       | Endothelial      | 21 | gene ~ trait + SVs +<br>Cocaethylene +<br>Nicotine_ng_mL +<br>Amphetamines +<br>Barbiturates +<br>disaster_count +<br>childhood count                                                                                                                                  |
|  |  |       | Astrocytes       | 43 | gene ~ trait + SVs +<br>Cocaethylene +<br>Amphetamines +<br>assault count                                                                                                                                                                                              |
|  |  |       | Microglia        | 12 | gene ~ trait + SVs +<br>Handedness +<br>Acetone +<br>Ethanol_mg_dL +<br>X11.Hydroxy.Delta.<br>9.THC.Active +<br>Benzoyllecgonine +<br>Hydrocodone +<br>Barbiturates +<br>Anticholinergics..An<br>tiparkinsonians +<br>Past.Self.Mutilation                             |
|  |  | DLPFC | InN              | 38 | gene ~ trait + SVs +<br>BMI..calculated. +<br>Cocaethylene +<br>Hallucinogens +<br>witness_count +<br>personal count                                                                                                                                                   |
|  |  |       | ExN              | 37 | gene ~ trait + SVs +<br>Cocaethylene +<br>Barbiturates +<br>Hallucinogens +<br>witness count                                                                                                                                                                           |
|  |  |       | Oligodendrocytes | 54 | gene ~ trait + SVs +<br>Handedness +                                                                                                                                                                                                                                   |

|  |  |     |                  |    |                                                                                                                                                                                                                                    |
|--|--|-----|------------------|----|------------------------------------------------------------------------------------------------------------------------------------------------------------------------------------------------------------------------------------|
|  |  |     |                  |    | Barbiturates + Ketamine + Anticholinergics..An tiparkinsonians + ECT + witness_count + personal_count + combat occ count                                                                                                           |
|  |  |     | Endothelial      | 17 | gene ~ trait + SVs + Manner_of_death_Accident + GERD + X11.Hydroxy.Delta. 9.THC.Active + Benzoyllecgonine_mg_L_blood + Barbiturates + Delusions + combat occ count                                                                 |
|  |  |     | Astrocytes       | 39 | gene ~ trait + SVs + X11.Hydroxy.Delta. 9.THC.Active + Amphetamines + personal_count + combat occ count                                                                                                                            |
|  |  |     | Microglia        | 8  | gene ~ trait + SVs + Handedness + Manner_of_death_Accident + Isopropanol + X11.Hydroxy.Delta. 9.THC.Active + Benzoyllecgonine_mg_L_blood + Anticholinergics..An tiparkinsonians + Anti.Inflammatory + Delusions + combat occ count |
|  |  | MeA | InN              | 43 | gene ~ trait + SVs + Acetone + X11.Hydroxy.Delta. 9.THC.Active + Barbiturates + Ketamine + Hallucinogens + disaster_count + childhood count                                                                                        |
|  |  |     | ExN              | 50 | gene ~ trait + SVs + Manner_of_death_Suicide + Isopropanol + Cocaethylene + Ketamine + Anticholinergics..An tiparkinsonians + ECT                                                                                                  |
|  |  |     | Oligodendrocytes | 46 | gene ~ trait + SVs + GERD + Acetone + X11.Hydroxy.Delta. 9.THC.Active + Benzoyllecgonine_mg_L_blood + Barbiturates + Ketamine + Anticholinergics..An tiparkinsonians + witness_count + combat occ count                            |
|  |  |     | Endothelial      | 42 | gene ~ trait + SVs + Nicotine ng mL +                                                                                                                                                                                              |

|          |           |       |                  |    |                                                                                                                                                                                                           |                                                                                                                                                                                                                                            |
|----------|-----------|-------|------------------|----|-----------------------------------------------------------------------------------------------------------------------------------------------------------------------------------------------------------|--------------------------------------------------------------------------------------------------------------------------------------------------------------------------------------------------------------------------------------------|
|          |           |       |                  |    | Barbiturates +<br>Hallucinogens +<br>disaster count                                                                                                                                                       |                                                                                                                                                                                                                                            |
|          |           |       | Astrocytes       | 51 | gene ~ trait + SVs +<br>Cocaethylene +<br>Hallucinogens +<br>Other.Drugs + ECT<br>+ witness count                                                                                                         |                                                                                                                                                                                                                                            |
|          |           |       | Microglia        | 24 | gene ~ trait + SVs +<br>Acetone +<br>Cocaethylene +<br>Benzoyllecgonine_m<br>g_L_blood +<br>Barbiturates +<br>Ketamine +<br>Anticholinergics..An<br>tiparkinsonians +<br>Hallucinogens +<br>witness count |                                                                                                                                                                                                                                            |
| Fentanyl | Bulk      | DLPFC | NA               | 22 | gene ~ trait + SVs +<br>Handedness +<br>Amphetamines +<br>Barbiturates +<br>personal_count +<br>combat_occ count                                                                                          |                                                                                                                                                                                                                                            |
|          |           | dACC  | NA               | 21 | gene ~ trait + SVs +<br>Handedness +<br>Delta.9.TH.C.Active<br>+ Tramadol +<br>Amphetamines +<br>Ketamine +<br>personal count                                                                             |                                                                                                                                                                                                                                            |
|          |           | BLA   | NA               | 25 | gene ~ trait + SVs +<br>Delta.9.TH.C.Active<br>+ Barbiturates +<br>Anticholinergics..An<br>tiparkinsonians +<br>witness any                                                                               |                                                                                                                                                                                                                                            |
|          |           | MeA   | NA               | 27 | gene ~ trait + SVs +<br>PTSD_PrimaryDx +<br>Hydrocodone +<br>Barbiturates +<br>personal count                                                                                                             |                                                                                                                                                                                                                                            |
|          | Cell-type | BLA   | InN              |    | 54                                                                                                                                                                                                        | gene ~ trait + SVs +<br>Acetone +<br>X11.Hydroxy.Delta.<br>9.TH.C.Active +<br>Cocaethylene +<br>Hydrocodone +<br>Ketamine +<br>Anticholinergics..An<br>tiparkinsonians +<br>Antipsychotics +<br>Hallucinogens +<br>ECT +<br>disaster count |
|          |           |       | ExN              |    | 43                                                                                                                                                                                                        | Gene ~ trait + SVs +<br>Isopropanol +<br>cocaethylene +<br>witness_count +<br>combat_occ any                                                                                                                                               |
|          |           |       | Oligodendrocytes |    | 43                                                                                                                                                                                                        | gene ~ trait + SVs +<br>X11.Hydroxy.Delta.<br>9.TH.C.Active +<br>Amphetamines +<br>Barbiturates +<br>Ketamine +<br>disaster count                                                                                                          |



|  |  |      |                  |    |                                                                                                                                                                                                           |
|--|--|------|------------------|----|-----------------------------------------------------------------------------------------------------------------------------------------------------------------------------------------------------------|
|  |  |      | Endothelial      | 38 | gene ~ trait + SVs + Handedness + X11.Hydroxy.Delta. 9.THC.Active + Barbiturates + Hallucinogens + witness_count + personal_count                                                                         |
|  |  |      | Astrocytes       | 49 | gene ~ trait + SVs + Ketamine + Anticholinergics..An tiparkinsonians + Hallucinogens + ECT + witness_count + personal_count                                                                               |
|  |  |      | Microglia        | 27 | gene ~ trait + SVs + Isopropanol + X11.Hydroxy.Delta. 9.THC.Active + Cocaethylene + Barbiturates + Ketamine + Anticholinergics..An tiparkinsonians + Hallucinogens + ECT + witness_count + personal_count |
|  |  | dACC | InN              | 38 | gene ~ trait + SVs + Isopropanol + Anti.Inflammatory + personal_count                                                                                                                                     |
|  |  |      | ExN              | 40 | gene ~ trait + SVs + Cocaethylene + Tramadol + personal_count                                                                                                                                             |
|  |  |      | Oligodendrocytes | 55 | gene ~ trait + SVs + Cocaethylene + Benzoylcegonine_m g_L_blood + Hydrocodone + Barbiturates + Anticholinergics..An tiparkinsonians + witness_count                                                       |
|  |  |      | Endothelial      | 21 | gene ~ trait + SVs + Cocaethylene + Nicotine_ng_mL + Amphetamines + Barbiturates + disaster_any + childhood_count                                                                                         |
|  |  |      | Astrocytes       | 43 | gene ~ trait + SVs + Cocaethylene + Amphetamines + Past.Self.Mutilation + Famhx.Suicide + combat_occ_any                                                                                                  |
|  |  |      | Microglia        | 13 | gene ~ trait + SVs + Handedness + Acetone + Ethanol_mg_dL + X11.Hydroxy.Delta. 9.THC.Active + Morphine + Anticholinergics..An tiparkinsonians + witness_count                                             |

|  |  |       |                  |    |                                                                                                                                                                                                                             |
|--|--|-------|------------------|----|-----------------------------------------------------------------------------------------------------------------------------------------------------------------------------------------------------------------------------|
|  |  |       | InN              | 38 | gene ~ trait + SVs +<br>Cocaethylene +<br>Hallucinogens +<br>witness_count +<br>personal_count                                                                                                                              |
|  |  |       | ExN              | 36 | gene ~ trait + SVs +<br>Cocaethylene +<br>Benzoylecgonine_m<br>g_L_blood +<br>Barbiturates +<br>Hallucinogens +<br>witness_count                                                                                            |
|  |  |       | Oligodendrocytes | 53 | gene ~ trait + SVs +<br>Barbiturates +<br>Ketamine +<br>Anticholinergics..An<br>tiparkinsonians +<br>ECT +<br>witness_count +<br>personal_count +<br>combat_occ_count                                                       |
|  |  | DLPFC | Endothelial      | 17 | gene ~ trait + SVs +<br>GERD +<br>X11.Hydroxy.Delta.<br>9.THC.Active +<br>Cocaethylene +<br>Barbiturates + ECT<br>+ witness_count +<br>personal_count +<br>combat_occ_count                                                 |
|  |  |       | Astrocytes       | 38 | gene ~ trait + SVs +<br>Cocaethylene +<br>Amphetamines +<br>childhood_count                                                                                                                                                 |
|  |  |       | Microglia        | 8  | gene ~ trait + SVs +<br>Manner_of_death_A<br>ccident + Ethanol +<br>Isopropanol +<br>X11.Hydroxy.Delta.<br>9.THC.Active +<br>Anti.Inflammatories<br>+<br>EA_UA_neglect_co<br>unt +<br>personal_count +<br>combat_only_count |
|  |  | MeA   | InN              | 44 | gene ~ trait + SVs +<br>Acetone +<br>Barbiturates +<br>Ketamine +<br>Anticholinergics..An<br>tiparkinsonians +<br>Hallucinogens +<br>ECT +<br>disaster_count                                                                |
|  |  |       | ExN              | 50 | gene ~ trait + SVs +<br>Isopropanol +<br>Barbiturates +<br>Ketamine +<br>Anticholinergics..An<br>tiparkinsonians +<br>Hallucinogens +<br>EA_UA_neglect_co<br>unt                                                            |
|  |  |       | Oligodendrocytes | 45 | gene ~ trait + SVs +<br>Acetone +<br>X11.Hydroxy.Delta.<br>9.THC.Active +<br>Benzoylecgonine +                                                                                                                              |

|             |           |       |                  |    |                                                                                                                                                                                            |
|-------------|-----------|-------|------------------|----|--------------------------------------------------------------------------------------------------------------------------------------------------------------------------------------------|
|             |           |       |                  |    | Amphetamines +<br>Barbiturates +<br>Ketamine<br>Anticholinergics..An<br>tiparkinsonians<br>witness_count                                                                                   |
|             |           |       | Endothelial      | 41 | gene ~ trait + SVs +<br>Nicotine_ng_mL +<br>Barbiturates +<br>Hallucinogens +<br>disaster_count +<br>childhood_count                                                                       |
|             |           |       | Astrocytes       | 50 | gene ~ trait + SVs +<br>Cocaethylene +<br>Benzoylcegonine_m<br>g_L_blood +<br>Hallucinogens +<br>ECT +<br>witness_count                                                                    |
|             |           |       | Microglia        | 24 | gene ~ trait + SVs +<br>Handedness +<br>Isopropanol +<br>Barbiturates +<br>Ketamine +<br>Anticholinergics..An<br>tiparkinsonians +<br>Hallucinogens +<br>witness_count +<br>personal_count |
| Oxymorphone | Bulk      | DLPFC | NA               | 22 | gene ~ trait + SVs +<br>Amphetamines +<br>personal_count +<br>combat_occ_count                                                                                                             |
|             |           | dACC  |                  | 21 | gene ~ trait + SVs +<br>Delta.9.TH.C.Active<br>+ Amphetamines +<br>Ketamine +<br>personal_any                                                                                              |
|             |           | BLA   |                  | 25 | gene ~ trait + SVs +<br>Delta.9.TH.C.Active<br>+<br>Anticholinergics..An<br>tiparkinsonians +<br>witness_count                                                                             |
|             |           | MeA   |                  | 27 | gene ~ trait + SVs +<br>Barbiturates +<br>Hx.Other.Trauma +                                                                                                                                |
|             | Cell-type | BLA   | InN              | 54 | gene ~ trait + SVs +<br>Acetone +<br>Delta.9.Carboxy.TH<br>C.Inactive +<br>Ketamine +<br>Anticholinergics..An<br>tiparkinsonians +<br>Hallucinogens +<br>ECT +<br>disaster_count           |
|             |           |       | ExN              | 42 | gene ~ trait + SVs +<br>Isopropanol +<br>Cocaethylene +<br>Famhx.Suicide +<br>combat_only_count                                                                                            |
|             |           |       | Oligodendrocytes | 44 | gene ~ trait + SVs +<br>Amphetamines +<br>Barbiturates +<br>Ketamine +<br>EA_UA_neglect_co<br>unt + disaster_count                                                                         |

|  |  |      |                  |    |                                                                                                                                                                                                         |
|--|--|------|------------------|----|---------------------------------------------------------------------------------------------------------------------------------------------------------------------------------------------------------|
|  |  |      | Endothelial      | 38 | gene ~ trait + SVs + Handedness + X11.Hydroxy.Delta. 9.THC.Active + Barbiturates + Hallucinogens + witness_count + personal_count                                                                       |
|  |  |      | Astrocytes       | 49 | gene ~ trait + SVs + Isopropanol + Ketamine + Anticholinergics..An tiparkinsonians + Hallucinogens + ECT + witness_count + personal_count                                                               |
|  |  |      | Microglia        | 28 | gene ~ trait + SVs + Handedness + Isopropanol + X11.Hydroxy.Delta. 9.THC.Active + Barbiturates + Ketamine + Anticholinergics..An tiparkinsonians + Hallucinogens + ECT + witness_count + personal_count |
|  |  | dACC | InN              | 39 | gene ~ trait + SVs + Isopropanol + Benzoyllecgonine_mg_L_blood + Anti.Inflammatory                                                                                                                      |
|  |  |      | ExN              | 40 | gene ~ trait + SVs + Cocaethylene + Amphetamines + personal_count                                                                                                                                       |
|  |  |      | Oligodendrocytes | 55 | gene ~ trait + SVs + Cocaethylene + Benzoyllecgonine_mg_L_blood + Barbiturates + Anticholinergics..An tiparkinsonians + witness_count                                                                   |
|  |  |      | Endothelial      | 20 | gene ~ trait + SVs + Isopropanol + Cocaethylene + Nicotine_ng_mL + Amphetamines + Barbiturates + disaster_any + childhood_count                                                                         |
|  |  |      | Astrocytes       | 43 | gene ~ trait + SVs + Cocaethylene + Benzoyllecgonine_mg_L_blood + witness_count                                                                                                                         |
|  |  |      | Microglia        | 12 | gene ~ trait + SVs + Handedness + Acetone + Ethanol_mg_dL + X11.Hydroxy.Delta. 9.THC.Active + Benzoyllecgonine + Hydrocodone + Barbiturates +                                                           |

|  |       |                  |    |                                                                                                                                                                                                                 |
|--|-------|------------------|----|-----------------------------------------------------------------------------------------------------------------------------------------------------------------------------------------------------------------|
|  |       |                  |    | Anticholinergics..An<br>tiparkinsonians                                                                                                                                                                         |
|  | DLPFC | InN              | 38 | gene ~ trait + SVs +<br>BMI..calculated. +<br>Cocaethylene +<br>Hallucinogens +<br>witness_count +<br>personal_count                                                                                            |
|  |       | ExN              | 37 | gene ~ trait + SVs +<br>Delta.9.THC.Active<br>+<br>Benzoylcegonine_m<br>g_L_blood +<br>Hallucinogens +<br>witness_count                                                                                         |
|  |       | Oligodendrocytes | 54 | gene ~ trait + SVs +<br>Handedness +<br>Barbiturates +<br>Anticholinergics..An<br>tiparkinsonians +<br>witness_count +<br>personal_count +<br>combat_occ_count                                                  |
|  |       | Endothelial      | 17 | gene ~ trait + SVs +<br>Manner_of_death_A<br>ccident +<br>Isopropanol +<br>X11.Hydroxy.Delta.<br>9.THC.Active +<br>Amphetamines +<br>Barbiturates +<br>Delusions +<br>personal_count +<br>combat_occ_count      |
|  |       | Astrocytes       | 38 | gene ~ trait + SVs +<br>Amphetamines +<br>personal_count                                                                                                                                                        |
|  |       | Microglia        | 8  | gene ~ trait + SVs +<br>Handedness +<br>Manner_of_death_A<br>ccident +<br>Isopropanol +<br>X11.Hydroxy.Delta.<br>9.THC.Active +<br>Anti.Inflammatories<br>+ Delusions +<br>personal_count +<br>combat_occ_count |
|  | MeA   | InN              | 43 | gene ~ trait + SVs +<br>Acetone +<br>Barbiturates +<br>Ketamine +<br>Hallucinogens +<br>disaster_count +<br>childhood_count                                                                                     |
|  |       | ExN              | 49 | gene ~ trait + SVs +<br>Isopropanol +<br>Barbiturates +<br>Ketamine +<br>Anticholinergics..An<br>tiparkinsonians +<br>EA_UA_neglect_co<br>unt                                                                   |
|  |       | Oligodendrocytes | 46 | gene ~ trait + SVs +<br>Other.Opiates +<br>Barbiturates +<br>Ketamine +<br>Anticholinergics..An<br>tiparkinsonians +                                                                                            |

|          |           |       |                  |    |                                                                                                                                                                    |
|----------|-----------|-------|------------------|----|--------------------------------------------------------------------------------------------------------------------------------------------------------------------|
|          |           |       |                  |    | witness_count + personal_count                                                                                                                                     |
|          |           |       | Endothelial      | 41 | gene ~ trait + SVs + Handedness + X11.Hydroxy.Delta.9.THC.Active + Barbiturates + Anti.Inflammatory + witness_count + personal_count + combat_occ_count            |
|          |           |       | Astrocytes       | 51 | gene ~ trait + SVs + Cocaethylene + Benzoyllecgonine_mg_L_blood + Hallucinogens + ECT + witness_count                                                              |
|          |           |       | Microglia        | 24 | gene ~ trait + SVs + Acetone + Cocaethylene + Nicotine_ng_mL + Barbiturates + Ketamine + Anticholinergics..Antiparkinsonians + Hallucinogens + non_combat_count    |
| Migraine | Bulk      | DLPFC | NA               | 22 | gene ~ trait + SVs + Handedness + Amphetamines + personal_count + combat_occ_count                                                                                 |
|          |           | dACC  |                  | 21 | gene ~ trait + SVs + Handedness + Delta.9.THC.Active + Tramadol + Amphetamines + Ketamine + personal_count                                                         |
|          |           | BLA   |                  | 25 | gene ~ trait + SVs + Delta.9.THC.Active + Barbiturates + Anticholinergics..Antiparkinsonians + witness_count                                                       |
|          |           | MeA   |                  | 27 | gene ~ trait + SVs + PTSD_PrimaryDx + Barbiturates + personal_count                                                                                                |
|          | Cell-type | BLA   | InN              | 54 | gene ~ trait + SVs + Acetone + Cocaethylene + Hydrocodone + Ketamine + Anticholinergics..Antiparkinsonians + Antipsychotics + Hallucinogens + ECT + disaster_count |
|          |           |       | ExN              | 43 | gene ~ trait + SVs + Isopropanol + Cocaethylene + Past.Self.Mutilation + combat_occ_any                                                                            |
|          |           |       | Oligodendrocytes | 43 | gene ~ trait + SVs + X11.Hydroxy.Delta.9.THC.Active +                                                                                                              |

|  |  |      |                  |    |                                                                                                                                                                                                       |
|--|--|------|------------------|----|-------------------------------------------------------------------------------------------------------------------------------------------------------------------------------------------------------|
|  |  |      |                  |    | Amphetamines +<br>Barbiturates +<br>Ketamine +<br>disaster_count                                                                                                                                      |
|  |  |      | Endothelial      | 38 | gene ~ trait + SVs +<br>Handedness +<br>Acetone +<br>X11.Hydroxy.Delta.<br>9.THC.Active +<br>Barbiturates +<br>Hallucinogens +<br>childhood_count                                                     |
|  |  |      | Astrocytes       | 49 | gene ~ trait + SVs +<br>Ketamine +<br>Anticholinergics..An<br>tiparkinsonians +<br>Hallucinogens +<br>ECT +<br>witness_count +<br>personal_count                                                      |
|  |  |      | Microglia        | 28 | gene ~ trait + SVs +<br>Isopropanol +<br>Cocaethylene +<br>Barbiturates +<br>Ketamine +<br>Anticholinergics..An<br>tiparkinsonians +<br>Hallucinogens +<br>ECT +<br>witness_count +<br>personal_count |
|  |  | dACC | InN              | 38 | gene ~ trait + SVs +<br>BMI..calculated. +<br>Isopropanol +<br>Anti.Inflammatory<br>+ personal_count                                                                                                  |
|  |  |      | ExN              | 40 | gene ~ trait + SVs +<br>Cocaethylene +<br>Benzoyllecgonine_m<br>g_L_blood +<br>Anti.Inflammatory                                                                                                      |
|  |  |      | Oligodendrocytes | 55 | gene ~ trait + SVs +<br>Cocaethylene +<br>Benzoyllecgonine_m<br>g_L_blood +<br>Barbiturates +<br>Anticholinergics..An<br>tiparkinsonians                                                              |
|  |  |      | Endothelial      | 21 | gene ~ trait + SVs +<br>Cocaethylene +<br>Nicotine_ng_mL +<br>Amphetamines +<br>Barbiturates +<br>disaster_count +<br>childhood_count                                                                 |
|  |  |      | Astrocytes       | 43 | gene ~ trait + SVs +<br>Cocaethylene +<br>Benzoyllecgonine_m<br>g_L_blood +<br>witness_count +<br>combat_occ_count                                                                                    |
|  |  |      | Microglia        | 12 | gene ~ trait + SVs +<br>Isopropanol +<br>X11.Hydroxy.Delta.<br>9.THC.Active +<br>Cocaethylene +<br>Benzoyllecgonine_m<br>g_L_blood +<br>Hydrocodone +                                                 |

|  |  |       |                  |                                                                                            |                                                                                                                                                                                                                                                                            |
|--|--|-------|------------------|--------------------------------------------------------------------------------------------|----------------------------------------------------------------------------------------------------------------------------------------------------------------------------------------------------------------------------------------------------------------------------|
|  |  |       |                  | Barbiturates +<br>Ketamine +<br>Anticholinergics..An<br>tiparkinsonians +<br>witness count |                                                                                                                                                                                                                                                                            |
|  |  | DLPFC | InN              | 37                                                                                         | gene ~ trait + SVs +<br>Cocaethylene +<br>Hallucinogens +<br>witness_count +<br>personal_count                                                                                                                                                                             |
|  |  |       | ExN              | 36                                                                                         | gene ~ trait + SVs +<br>Manner_of_death_A<br>ccident +<br>Delta.9.THC.Active<br>+<br>Benzoyllecgonine_m<br>g_L_blood +<br>Hallucinogens                                                                                                                                    |
|  |  |       | Oligodendrocytes | 54                                                                                         | gene ~ trait + SVs +<br>Handedness +<br>Barbiturates +<br>Ketamine +<br>Anticholinergics..An<br>tiparkinsonians +<br>ECT +<br>witness_count +<br>personal_count +<br>combat occ count                                                                                      |
|  |  |       | Endothelial      | 17                                                                                         | gene ~ trait + SVs +<br>BML.calculated. +<br>X11.Hydroxy.Delta.<br>9.THC.Active +<br>Cocaethylene +<br>Tramadol +<br>Barbiturates +<br>personal_count                                                                                                                      |
|  |  |       | Astrocytes       | 38                                                                                         | gene ~ trait + SVs                                                                                                                                                                                                                                                         |
|  |  |       | Microglia        | 8                                                                                          | gene ~ trait + SVs +<br>Handedness +<br>Manner_of_death_A<br>ccident +<br>Isopropanol +<br>X11.Hydroxy.Delta.<br>9.THC.Active +<br>Benzoyllecgonine_m<br>g_L_blood +<br>Anticholinergics..An<br>tiparkinsonians +<br>Anti.Inflammatory<br>+ Delusions<br>combat only count |
|  |  | MeA   | InN              | 44                                                                                         | gene ~ trait + SVs +<br>Acetone +<br>Barbiturates +<br>Ketamine +<br>Hallucinogens +<br>disaster_count +<br>childhood count                                                                                                                                                |
|  |  |       | ExN              | 50                                                                                         | gene ~ trait + SVs +<br>Isopropanol +<br>Ketamine +<br>Anticholinergics..An<br>tiparkinsonians +<br>EA_UA_neglect_co<br>unt                                                                                                                                                |
|  |  |       | Oligodendrocytes | 46                                                                                         | gene ~ trait + SVs +<br>GERD + Acetone +<br>X11.Hydroxy.Delta.<br>9.THC.Active +                                                                                                                                                                                           |



|     |           |     |                  |    |                                                                                                                                                                 |
|-----|-----------|-----|------------------|----|-----------------------------------------------------------------------------------------------------------------------------------------------------------------|
|     |           |     |                  |    | Benzoyllecgonine_mg_L_blood + Barbiturates + Ketamine Anticholinergics..Antiparkinsonians witness count                                                         |
|     |           |     | Endothelial      | 41 | gene ~ trait + SVs + Barbiturates + Hallucinogens + witness_count + personal_count                                                                              |
|     |           |     | Astrocytes       | 51 | gene ~ trait + SVs + Cocaethylene + Benzoyllecgonine_mg_L_blood + Hallucinogens + ECT + witness_count                                                           |
|     |           |     | Microglia        | 24 | gene ~ trait + SVs + Acetone + Cocaethylene + Nicotine_ng_mL + Barbiturates + Ketamine + Anticholinergics..Antiparkinsonians + Hallucinogens + non_combat_count |
| PRS | Cell-type | BLA | InN              | 49 | gene ~ trait + SVs + Acetone + Cocaethylene + Hydrocodone + Ketamine + Anticholinergics..Antiparkinsonians + Antipsychotics + Last.PPD + ECT + disaster_count   |
|     |           |     | ExN              | 39 | gene ~ trait + SVs + Race + Barbiturates + witness_count + combat_only_count                                                                                    |
|     |           |     | Oligodendrocytes | 37 | gene ~ trait + SVs + Acetone + Amphetamines + Barbiturates + Ketamine + disaster_count + assault_count                                                          |
|     |           |     | Endothelial      | 34 | gene ~ trait + SVs + Acetone + X11.Hydroxy.Delta.9.THC.Active + Barbiturates + Hallucinogens + disaster_count + childhood_count                                 |
|     |           |     | Astrocytes       | 41 | gene ~ trait + SVs + Acetone + Benzoyllecgonine_mg_L_blood + Ketamine + Anticholinergics..Antiparkinsonians + Hallucinogens + ECT + witness_count               |

|  |  |       |                  |    |                                                                                                                                                                                                                                 |
|--|--|-------|------------------|----|---------------------------------------------------------------------------------------------------------------------------------------------------------------------------------------------------------------------------------|
|  |  |       | Microglia        | 26 | gene ~ trait + SVs +<br>Acetone +<br>Cocaethylene +<br>Barbiturates +<br>Ketamine +<br>Anticholinergics..An<br>tiparkinsonians +<br>Hallucinogens +<br>Age.Onset.Smoke +<br>ECT +<br>witness_count                              |
|  |  | dACC  | InN              | 33 | gene ~ trait + SVs +<br>Race +<br>Anti.Inflammatories<br>+ personal_count +<br>age_num_first_trau<br>ma_infer                                                                                                                   |
|  |  |       | ExN              | 34 | gene ~ trait + SVs +<br>Race + Acetone +<br>Cocaethylene +<br>Amphetamines +<br>Age.Onset.Smoke +<br>Past.Self.Mutilation                                                                                                       |
|  |  |       | Oligodendrocytes | 45 | gene ~ trait + SVs +<br>Manner_of_death_A<br>ccident +<br>Delta.9.THC.Active<br>+<br>Benzoyllecgonine_m<br>g_L_blood +<br>Barbiturates +<br>Anticholinergics..An<br>tiparkinsonians                                             |
|  |  |       | Endothelial      | 19 | gene ~ trait + SVs +<br>Race + Acetone +<br>Cocaethylene +<br>Nicotine_ng_mL +<br>Amphetamines +<br>Barbiturates +<br>witness_count +<br>disaster_count                                                                         |
|  |  |       | Astrocytes       | 37 | gene ~ trait + SVs +<br>Race + Acetone +<br>Cocaethylene +<br>Amphetamines +<br>Age.Onset.Smoke +<br>witness_count                                                                                                              |
|  |  |       | Microglia        | 11 | gene ~ trait + SVs +<br>Handedness +<br>Acetone +<br>Ethanol_mg_dL +<br>Benzoyllecgonine_m<br>g_L_blood +<br>Acetaminophen +<br>Ketamine +<br>Anticholinergics..An<br>tiparkinsonians +<br>Hx.Military.Service<br>+ witness_any |
|  |  | DLPFC | InN              | 34 | gene ~ trait + SVs +<br>Handedness +<br>Benzoyllecgonine_m<br>g_L_blood +<br>Age.Onset.Smoke +<br>witness_any +<br>combat_occ_any                                                                                               |
|  |  |       | ExN              | 34 | gene ~ trait + SVs +<br>Race +<br>Cocaethylene +                                                                                                                                                                                |

|  |  |     |                  |    |                                                                                                                                                                                                                  |
|--|--|-----|------------------|----|------------------------------------------------------------------------------------------------------------------------------------------------------------------------------------------------------------------|
|  |  |     |                  |    | Amphetamines +<br>Barbiturates +<br>personal_count +<br>age_num_first_trau<br>ma_infer                                                                                                                           |
|  |  |     | Oligodendrocytes | 44 | gene ~ trait + SVs +<br>Race +<br>Delta.9.THC.Active<br>+ Barbiturates +<br>Ketamine +<br>Anticholinergics..An<br>tiparkinsonians +<br>ECT +<br>witness_count +<br>personal_count                                |
|  |  |     | Endothelial      | 16 | gene ~ trait + SVs +<br>X11.Hydroxy.Delta.<br>9.THC.Active +<br>Cocaethylene +<br>Nicotine_ng_mL +<br>Amphetamines +<br>Barbiturates +<br>Famhx.Suicide +<br>disaster_count                                      |
|  |  |     | Astrocytes       | 34 | gene ~ trait + SVs +<br>Acetone +<br>X11.Hydroxy.Delta.<br>9.THC.Active +<br>Cocaethylene +<br>Amphetamines +<br>combat_occ_count +<br>childhood_count                                                           |
|  |  |     | Microglia        | 8  | gene ~ trait + SVs +<br>Handedness +<br>Ethanol + Acetone +<br>Delta.9.Carboxy.TH<br>C.Inactive +<br>Benzoylcegonine_m<br>g_L_blood +<br>Age.Onset.Smoke +<br>Past.Self.Mutilation<br>+ ECT +<br>Hx.Combat.Seen  |
|  |  | MeA | InN              | 42 | gene ~ trait + SVs +<br>Acetone +<br>Barbiturates +<br>Ketamine +<br>Anticholinergics..An<br>tiparkinsonians +<br>Hallucinogens +<br>ECT +<br>disaster_count                                                     |
|  |  |     | ExN              | 44 | gene ~ trait + SVs +<br>Ketamine +<br>Anticholinergics..An<br>tiparkinsonians +<br>ECT +<br>combat_occ_count                                                                                                     |
|  |  |     | Oligodendrocytes | 41 | gene ~ trait + SVs +<br>X11.Hydroxy.Delta.<br>9.THC.Active +<br>Amphetamines +<br>Barbiturates +<br>Ketamine +<br>Anticholinergics..An<br>tiparkinsonians<br>witness_count<br>personal_count<br>combat_occ_count |

|  |  |  |             |    |                                                                                                                                                                        |
|--|--|--|-------------|----|------------------------------------------------------------------------------------------------------------------------------------------------------------------------|
|  |  |  | Endothelial | 36 | gene ~ trait + SVs +<br>Acetone +<br>X11.Hydroxy.Delta.<br>9.THC.Active +<br>Barbiturates +<br>Hallucinogens +<br>disaster_count +<br>childhood_count                  |
|  |  |  | Astrocytes  | 42 | gene ~ trait + SVs +<br>plate +<br>Cocaethylene +<br>Amphetamines +<br>childhood_count                                                                                 |
|  |  |  | Microglia   | 22 | gene ~ trait + SVs +<br>Cocaethylene<br>+Oxymorphone +<br>Barbiturates +<br>Ketamine +<br>Anticholinergics.An<br>tiparkinsonians +<br>Hallucinogens +<br>witness_count |

**Table S2: Additional DEGs in MeA and BLA OPCs.**

| Trait        | Region | gene     | Z        | P        | P_bonf   |
|--------------|--------|----------|----------|----------|----------|
| Chronic pain | BLA    | YBX3     | -5.1     | 7.69E-07 | 1.44E-02 |
|              |        | CD84     | -5.81    | 2.29E-08 | 4.27E-04 |
|              |        | GADD45A  | -5.68    | 4.48E-08 | 8.38E-04 |
|              |        | BAG3     | -5.37    | 2.06E-07 | 3.86E-03 |
|              | MeA    | DYNLL1   | -4.9     | 1.88E-06 | 3.51E-02 |
|              |        | PDGFB    | -5.51    | 9.82E-08 | 1.83E-03 |
|              |        | WDR83OS  | -5.35    | 2.21E-07 | 4.14E-03 |
|              |        | ETV3     | -5.23    | 3.87E-07 | 7.23E-03 |
|              |        | DUSP4    | -5.09    | 7.54E-07 | 1.41E-02 |
|              |        | EGR2     | -5.59    | 6.73E-08 | 1.26E-03 |
|              |        | COX16    | -5.05    | 9.32E-07 | 1.74E-02 |
|              |        | TEC      | 4.86     | 2.29E-06 | 4.27E-02 |
|              |        | PROSC    | -5.75    | 2.99E-08 | 5.60E-04 |
|              |        | UCN      | 5.26     | 3.36E-07 | 6.27E-03 |
|              |        | CRK      | -4.94    | 1.52E-06 | 2.84E-02 |
|              |        | TRIB1    | -5.09    | 7.56E-07 | 1.41E-02 |
|              |        | ZFP1     | -5.32    | 2.53E-07 | 4.72E-03 |
|              |        | ZNF511   | -5.04    | 9.87E-07 | 1.84E-02 |
|              |        | PRC1     | 4.95     | 1.46E-06 | 2.73E-02 |
|              |        | LBH      | -4.96    | 1.45E-06 | 2.70E-02 |
| C1orf233     | 5.05   | 9.10E-07 | 1.70E-02 |          |          |
| GLUD1P3      | 4.95   | 1.51E-06 | 2.83E-02 |          |          |
| Oxymorphone  | BLA    | MASP1    | -4.87    | 2.24E-06 | 4.18E-02 |

|          |      |               |          |          |          |
|----------|------|---------------|----------|----------|----------|
|          |      | SPATA13       | -4.83    | 2.64E-06 | 4.93E-02 |
|          |      | RP11.309115.1 | -4.83    | 2.64E-06 | 4.93E-02 |
|          | MeA  | LBH           | -5.01    | 1.19E-06 | 2.23E-02 |
| Fentanyl | BLA  | EPHA3         | 5.26     | 3.68E-07 | 6.88E-03 |
|          |      | LZTS1         | 5.45     | 1.51E-07 | 2.81E-03 |
|          |      | SREBF1        | 5.63     | 5.95E-08 | 1.11E-03 |
|          |      | CACNG5        | 5.23     | 4.37E-07 | 8.16E-03 |
|          |      | DBC1          | 5.07     | 8.94E-07 | 1.67E-02 |
|          |      | ITCH          | 4.9      | 1.98E-06 | 3.70E-02 |
|          |      | PGM1          | 5.74     | 3.41E-08 | 6.38E-04 |
|          |      | SMOX          | 4.95     | 1.58E-06 | 2.96E-02 |
|          |      | CDC23         | 4.98     | 1.38E-06 | 2.58E-02 |
|          |      | EIF5          | -5.76    | 3.16E-08 | 5.90E-04 |
|          |      | KIAA0391      | 4.92     | 1.82E-06 | 3.41E-02 |
|          |      | TMEM87A       | 4.98     | 1.37E-06 | 2.56E-02 |
|          |      | CRYBA1        | 5.73     | 3.75E-08 | 7.00E-04 |
|          |      | TNFAIP1       | 5.65     | 5.44E-08 | 1.02E-03 |
|          |      | ARSB          | 5.46     | 1.42E-07 | 2.66E-03 |
|          |      | HES1          | 5.16     | 5.82E-07 | 1.09E-02 |
|          |      | PRDM2         | -4.95    | 1.57E-06 | 2.94E-02 |
|          |      | APH1A         | 5.5      | 1.17E-07 | 2.18E-03 |
|          |      | FMO6P         | 5.1      | 8.00E-07 | 1.50E-02 |
|          |      | AKAP1         | 5.32     | 2.76E-07 | 5.15E-03 |
|          |      | SDC4          | 4.86     | 2.41E-06 | 4.51E-02 |
|          |      | ABCC10        | -5.05    | 9.95E-07 | 1.86E-02 |
|          |      | SNAP25        | -5.2     | 4.85E-07 | 9.07E-03 |
|          |      | MED10         | -4.93    | 1.72E-06 | 3.21E-02 |
|          |      | RFK           | -5.25    | 3.81E-07 | 7.11E-03 |
|          |      | ITM2C         | 4.91     | 1.89E-06 | 3.54E-02 |
|          |      | MRPS9         | 4.9      | 1.96E-06 | 3.65E-02 |
|          |      | CCL21         | 5.03     | 1.09E-06 | 2.03E-02 |
|          |      | GRHPR         | 4.91     | 1.89E-06 | 3.54E-02 |
|          |      | LRRC32        | 5.04     | 1.05E-06 | 1.97E-02 |
|          |      | TMBIM6        | 5.03     | 1.10E-06 | 2.05E-02 |
|          |      | C18orf8       | -4.86    | 2.36E-06 | 4.40E-02 |
| GTDC2    | 5    | 1.26E-06      | 2.35E-02 |          |          |
| CDC123   | 4.9  | 1.98E-06      | 3.70E-02 |          |          |
| PFKM     | 5.65 | 5.37E-08      | 1.00E-03 |          |          |
| WNT7A    | 5.03 | 1.08E-06      | 2.01E-02 |          |          |

|  |     |               |       |          |          |
|--|-----|---------------|-------|----------|----------|
|  |     | SSR2          | 5.56  | 8.64E-08 | 1.61E-03 |
|  |     | CYBB          | -5.01 | 1.22E-06 | 2.28E-02 |
|  |     | ILK           | 5.19  | 5.21E-07 | 9.74E-03 |
|  |     | PBX3          | 5.29  | 3.28E-07 | 6.14E-03 |
|  |     | ECI1          | 4.93  | 1.74E-06 | 3.26E-02 |
|  |     | SF1           | -4.87 | 2.23E-06 | 4.17E-02 |
|  |     | CX3CR1        | -4.94 | 1.65E-06 | 3.08E-02 |
|  |     | GPR34         | -5.8  | 2.60E-08 | 4.86E-04 |
|  |     | LRRC20        | 5.1   | 7.97E-07 | 1.49E-02 |
|  |     | CES3          | -5.02 | 1.14E-06 | 2.14E-02 |
|  |     | LINC00982     | 4.98  | 1.38E-06 | 2.59E-02 |
|  |     | CCDC89        | -4.88 | 2.19E-06 | 4.09E-02 |
|  |     | C1orf194      | -4.98 | 1.37E-06 | 2.56E-02 |
|  |     | P2RY13        | -5.09 | 8.18E-07 | 1.53E-02 |
|  |     | SCN5A         | 6.53  | 5.25E-10 | 9.81E-06 |
|  |     | ZNF75D        | 4.85  | 2.50E-06 | 4.67E-02 |
|  |     | STMN3         | 5.25  | 3.94E-07 | 7.37E-03 |
|  |     | MPZL1         | 5.64  | 5.85E-08 | 1.09E-03 |
|  |     | DUSP27        | -4.96 | 1.52E-06 | 2.84E-02 |
|  |     | SNORD115.2    | 5.17  | 5.76E-07 | 1.08E-02 |
|  |     | FAM71F2       | -5.41 | 1.76E-07 | 3.29E-03 |
|  |     | RNVU1.18      | -6.15 | 4.18E-09 | 7.82E-05 |
|  |     | MLLT11        | -5.24 | 4.09E-07 | 7.64E-03 |
|  |     | AC009227.2    | 5.21  | 4.78E-07 | 8.93E-03 |
|  |     | RP11.180122.2 | 5.2   | 5.00E-07 | 9.34E-03 |
|  |     | RP3.437116.1  | -5.57 | 8.22E-08 | 1.54E-03 |
|  |     | USP17L4       | 5.6   | 7.20E-08 | 1.35E-03 |
|  |     | MYLK.AS2      | 5.18  | 5.38E-07 | 1.00E-02 |
|  | MeA | NDUFAF7       | -5.12 | 6.61E-07 | 1.23E-02 |
|  |     | NLE1          | 4.83  | 2.53E-06 | 4.74E-02 |
|  |     | POMGNT1       | 5.42  | 1.48E-07 | 2.77E-03 |
|  |     | RPLP0         | 4.95  | 1.43E-06 | 2.66E-02 |
|  |     | HIF1A         | 5.06  | 8.43E-07 | 1.57E-02 |
|  |     | PRPF6         | 5.14  | 5.99E-07 | 1.12E-02 |
|  |     | IDH3B         | 5.07  | 8.28E-07 | 1.55E-02 |
|  |     | NFAT5         | -4.82 | 2.61E-06 | 4.87E-02 |
|  |     | MYEF2         | -4.92 | 1.65E-06 | 3.09E-02 |
|  |     | MTCH2         | 5.12  | 6.51E-07 | 1.22E-02 |
|  |     | LDHB          | 6     | 7.51E-09 | 1.40E-04 |

|          |     |            |       |          |          |
|----------|-----|------------|-------|----------|----------|
|          |     | WASF1      | -4.87 | 2.12E-06 | 3.95E-02 |
|          |     | SELK       | 4.95  | 1.42E-06 | 2.65E-02 |
|          |     | NKTR       | -5.29 | 2.86E-07 | 5.35E-03 |
|          |     | PRDX1      | 5.82  | 2.01E-08 | 3.76E-04 |
|          |     | ALDH6A1    | 5.13  | 6.32E-07 | 1.18E-02 |
|          |     | PKN1       | 4.85  | 2.31E-06 | 4.31E-02 |
|          |     | MRPS7      | 5.24  | 3.63E-07 | 6.78E-03 |
|          |     | CASD1      | -5.44 | 1.39E-07 | 2.60E-03 |
|          |     | EIF3G      | 5.53  | 8.71E-08 | 1.63E-03 |
|          |     | MGAT1      | 4.9   | 1.81E-06 | 3.39E-02 |
|          |     | RAMP1      | 5.39  | 1.74E-07 | 3.26E-03 |
|          |     | PEMT       | 5.48  | 1.13E-07 | 2.11E-03 |
|          |     | CDK4       | 5.06  | 8.48E-07 | 1.59E-02 |
|          |     | ITM2C      | 6.48  | 5.44E-10 | 1.02E-05 |
|          |     | SCRN1      | 5.28  | 3.08E-07 | 5.75E-03 |
|          |     | CREBZF     | -5.31 | 2.61E-07 | 4.87E-03 |
|          |     | TRIM29     | -5.19 | 4.62E-07 | 8.63E-03 |
|          |     | ETNK1      | -4.93 | 1.58E-06 | 2.96E-02 |
|          |     | GALNT1     | 5.03  | 9.94E-07 | 1.86E-02 |
|          |     | MICU3      | -5.25 | 3.50E-07 | 6.54E-03 |
|          |     | UBN2       | -5.27 | 3.22E-07 | 6.02E-03 |
|          |     | FAM69B     | 5.5   | 9.92E-08 | 1.85E-03 |
|          |     | NDUFV1     | 5.33  | 2.30E-07 | 4.30E-03 |
|          |     | NSMCE1     | 5.25  | 3.46E-07 | 6.47E-03 |
|          |     | SNUPN      | 4.97  | 1.30E-06 | 2.42E-02 |
|          |     | PHC3       | -6.79 | 9.83E-11 | 1.84E-06 |
|          |     | COA4       | 5.06  | 8.60E-07 | 1.61E-02 |
|          |     | PLCD1      | 5.65  | 4.75E-08 | 8.88E-04 |
|          |     | LIN54      | -5.28 | 3.08E-07 | 5.76E-03 |
|          |     | TRIM33     | -5.18 | 4.82E-07 | 9.01E-03 |
|          |     | SNORA38B   | -5.23 | 3.92E-07 | 7.32E-03 |
|          |     | SNORA80    | -5.83 | 1.89E-08 | 3.54E-04 |
|          |     | C9orf135   | -4.85 | 2.32E-06 | 4.34E-02 |
|          |     | AC005594.3 | -5.09 | 7.59E-07 | 1.42E-02 |
|          |     | SNORD15B   | -4.88 | 1.96E-06 | 3.67E-02 |
|          |     | ACY1       | 5.27  | 3.22E-07 | 6.01E-03 |
| Migraine | MeA | SPAG4      | 4.99  | 1.26E-06 | 2.36E-02 |
|          |     | CCDC91     | -4.84 | 2.51E-06 | 4.69E-02 |
|          |     | ZDHHC12    | 4.83  | 2.62E-06 | 4.89E-02 |

**Table S3: Pathways (gene sets) enriched for additional chronic pain cell type DEGs.** Gene sets significantly ( $p < 1.53 \times 10^{-6}$ ) enriched for cell type DEGs with minimum N gene overlap = 10. GO = Gene Ontology. No gene sets were found to be significantly enriched for dACC microglia, dACC oligodendrocytes, medial amygdala astrocytes, and medial amygdala endothelial cell type DEGs.

| Region              | Cell Type                        | Category                          | GeneSet                                  | N_genes                | N_overlap | p                      |
|---------------------|----------------------------------|-----------------------------------|------------------------------------------|------------------------|-----------|------------------------|
| MeA                 | Microglia                        | GO biological processes           | GOBP_CYTOP<br>LASMIC_TRA<br>NSLATION     | 125                    | 14        | $5.16 \times 10^{-14}$ |
|                     |                                  |                                   | GOBP_PEPTID<br>E_METABOLIC<br>PROCESS    | 744                    | 20        | $4.12 \times 10^{-8}$  |
|                     |                                  |                                   | GOBP_PEPTID<br>E_BIOSYNTHETIC<br>PROCESS | 626                    | 18        | $7.91 \times 10^{-8}$  |
|                     |                                  |                                   | GOBP_AMIDE<br>BIOSYNTHETIC<br>PROCESS    | 752                    | 18        | $1.17 \times 10^{-6}$  |
|                     |                                  |                                   | GOBP_AMIDE<br>METABOLIC_P<br>ROCESS      | 1009                   | 21        | $1.28 \times 10^{-6}$  |
|                     |                                  | Chemical and Genetic perturbation | HSIAO_HOUSE<br>KEEPING_GEN<br>ES         | 332                    | 14        | $2.46 \times 10^{-8}$  |
|                     |                                  | GO cellular component             | GOCC_CYTOSOLIC_RIBOSOME                  | 67                     | 13        | $2.57 \times 10^{-16}$ |
|                     |                                  |                                   | GOCC_RIBOSOME                            | 180                    | 16        | $2.86 \times 10^{-14}$ |
|                     |                                  |                                   | GOCC_RIBOSOMAL_SUBUNIT                   | 149                    | 15        | $3.04 \times 10^{-14}$ |
|                     |                                  |                                   | GOCC_RIBONUCLEOPROTEIN_COMPLEX           | 668                    | 19        | $3.89 \times 10^{-8}$  |
|                     |                                  | GO molecular function             | GOMF_STRUCTURAL_CONSTITUENT_OF_RIBOSOME  | 132                    | 14        | $1.11 \times 10^{-13}$ |
|                     |                                  |                                   | GOMF_STRUCTURAL_MOLECULE_ACTIVITY        | 591                    | 18        | $3.31 \times 10^{-8}$  |
|                     |                                  | Computational gene sets           | MORF_TPT1                                | 73                     | 13        | $8.45 \times 10^{-16}$ |
|                     |                                  |                                   | MODULE_83                                | 266                    | 19        | $5.08 \times 10^{-15}$ |
|                     |                                  |                                   | MORF_ACTG1                               | 105                    | 13        | $1.16 \times 10^{-13}$ |
|                     |                                  |                                   | GNF2_EIF3S6                              | 93                     | 12        | $6.46 \times 10^{-13}$ |
|                     |                                  |                                   | MORF_NPM1                                | 126                    | 13        | $1.27 \times 10^{-12}$ |
|                     |                                  |                                   | MODULE_114                               | 285                    | 17        | $2.92 \times 10^{-12}$ |
|                     |                                  |                                   | MODULE_151                               | 269                    | 16        | $1.41 \times 10^{-11}$ |
|                     |                                  |                                   | GNF2_FBL                                 | 117                    | 11        | $2.06 \times 10^{-10}$ |
| MORF_NME2           | 126                              |                                   | 11                                       | $4.60 \times 10^{-10}$ |           |                        |
| MODULE_32           | 209                              | 11                                | $9.32 \times 10^{-8}$                    |                        |           |                        |
| Cell type signature | TRAVAGLINI_LUNG_CD4_NAIVE_T_CELL | 109                               | 15                                       | $2.59 \times 10^{-16}$ |           |                        |



|  |  |  |                                                                         |     |    |                        |
|--|--|--|-------------------------------------------------------------------------|-----|----|------------------------|
|  |  |  | RUBENSTEIN_SKELETAL_MUSCLE_T_CELLS                                      | 142 | 15 | 1.47x10 <sup>-14</sup> |
|  |  |  | BUSSLINGER_GASTRIC_PP1R1B_POSITIVE_CELLS                                | 92  | 13 | 1.98x10 <sup>-14</sup> |
|  |  |  | TRAVAGLINI_LUNG_BRONCHIAL_VESSEL_1_CELL                                 | 196 | 16 | 1.09x10 <sup>-13</sup> |
|  |  |  | HAY_BONE_MARROW_NAIVE_T_CELL                                            | 321 | 19 | 1.53x10 <sup>-13</sup> |
|  |  |  | TRAVAGLINI_LUNG_CLUB_CELL                                               | 92  | 12 | 5.65x10 <sup>-13</sup> |
|  |  |  | RUBENSTEIN_SKELETAL_MUSCLE_SATELLITE_CELLS                              | 260 | 17 | 6.65x10 <sup>-13</sup> |
|  |  |  | MURARO_PANCREAS_ACINAR_CELL                                             | 622 | 24 | 7.86x10 <sup>-13</sup> |
|  |  |  | RUBENSTEIN_SKELETAL_MUSCLE_B_CELLS                                      | 128 | 13 | 1.56x10 <sup>-12</sup> |
|  |  |  | BUSSLINGER_DUODENAL_TRANSIT_AMPLIFYING_CELLS                            | 161 | 14 | 1.76x10 <sup>-12</sup> |
|  |  |  | BUSSLINGER_DUODENAL_DIFFERENTIATING_STEM_CELLS                          | 257 | 16 | 7.08x10 <sup>-12</sup> |
|  |  |  | LAKE_ADULT_KIDNEY_C7_PROXIMAL_TUBULE_EPITHELIAL_CELLS_3                 | 106 | 11 | 7.00x10 <sup>-11</sup> |
|  |  |  | BUSSLINGER_DUODENAL_IMMUNE_CELLS                                        | 807 | 24 | 1.82x10 <sup>-10</sup> |
|  |  |  | LAKE_ADULT_KIDNEY_C10_THIN_ASCENDING_LIMB                               | 305 | 15 | 9.17x10 <sup>-10</sup> |
|  |  |  | LAKE_ADULT_KIDNEY_C12_THICK_ASCENDING_LIMB                              | 341 | 15 | 4.21x10 <sup>-09</sup> |
|  |  |  | BUSSLINGER_DUODENAL_STEM_CELLS                                          | 260 | 13 | 1.08x10 <sup>-08</sup> |
|  |  |  | LAKE_ADULT_KIDNEY_C19_COLLECTING_DUCT_INTERCALATED_CELLS_TYPE_A_MEDULLA | 283 | 13 | 2.96x10 <sup>-08</sup> |
|  |  |  | RUBENSTEIN_SKELETAL_MUSCLE_PCV_E                                        | 188 | 11 | 3.15x10 <sup>-08</sup> |

|  |  |                    |                                                                                     |     |    |                        |
|--|--|--------------------|-------------------------------------------------------------------------------------|-----|----|------------------------|
|  |  |                    | NDOTHELIAL_ CELLS                                                                   |     |    |                        |
|  |  |                    | TRAVAGLINI_ LUNG_ CAPILL ARY_ INTERME DIATE_ 2_ CELL                                | 353 | 14 | 5.29x10 <sup>-08</sup> |
|  |  |                    | TRAVAGLINI_ LUNG_ MESOT HELIAL_ CELL                                                | 542 | 17 | 5.47x10 <sup>-08</sup> |
|  |  |                    | LAKE_ ADULT_ KIDNEY_ C9_ T HIN_ ASCENDI NG_ LIMB                                    | 231 | 11 | 2.56x10 <sup>-07</sup> |
|  |  | Canonical Pathways | REACTOME_ E UKARYOTIC_ T RANSLATION_ ELONGATION                                     | 64  | 14 | 2.77x10 <sup>-18</sup> |
|  |  |                    | KEGG_ RIBOSO ME                                                                     | 60  | 13 | 5.42x10 <sup>-17</sup> |
|  |  |                    | WP_ CYTOPLA SMIC_ RIBOSO MAL_ PROTEIN S                                             | 62  | 13 | 8.62x10 <sup>-17</sup> |
|  |  |                    | REACTOME_ R ESPONSE_ OF_ EIF2AK4_ GCN 2_ TO_ AMINO ACID_ DEFICIE NCY                | 74  | 13 | 1.02x10 <sup>-15</sup> |
|  |  |                    | REACTOME_ C ELLULAR_ RES PONSE_ TO_ ST ARVATION                                     | 122 | 15 | 1.47x10 <sup>-15</sup> |
|  |  |                    | REACTOME_ N ONSENSE_ ME DIATED_ DECA Y_ NMD                                         | 83  | 13 | 4.92x10 <sup>-15</sup> |
|  |  |                    | REACTOME_ S RP_ DEPEND E_ NT_ COTRANS LATIONAL_ PR OTEIN_ TARGE TING_ TO_ ME MBRANE | 85  | 13 | 6.80x10 <sup>-15</sup> |
|  |  |                    | REACTOME_ S ELENOAMINO ACID_ METAB OLISM                                            | 87  | 13 | 9.32x10 <sup>-15</sup> |
|  |  |                    | REACTOME_ E UKARYOTIC_ T RANSLATION_ INITIATION                                     | 89  | 13 | 1.27x10 <sup>-14</sup> |
|  |  |                    | REACTOME_ I NFLUENZA_ IN FECTION                                                    | 127 | 13 | 1.41x10 <sup>-12</sup> |
|  |  |                    | REACTOME_ R RNA_ PROCESS ING                                                        | 164 | 14 | 2.27x10 <sup>-12</sup> |
|  |  |                    | REACTOME_ R EGULATION_ O F_ EXPRESSIO N_ OF_ SLITS_ A ND_ ROBO S                    | 133 | 13 | 2.56x10 <sup>-12</sup> |
|  |  |                    | REACTOME_ T RANSLATION                                                              | 251 | 16 | 4.95x10 <sup>-12</sup> |
|  |  |                    | REACTOME_ SI GNALING_ BY_ ROBO_ RECEP TORS                                          | 177 | 13 | 9.74x10 <sup>-11</sup> |

|  |                  |                                   |                                                    |      |    |                        |
|--|------------------|-----------------------------------|----------------------------------------------------|------|----|------------------------|
|  |                  |                                   | REACTOME_DEVELOPMENTAL_BIOLOGY                     | 833  | 22 | 1.06x10 <sup>-08</sup> |
|  |                  |                                   | REACTOME_NERVOUS_SYSTEM_DEVELOPMENT                | 522  | 17 | 3.17x10 <sup>-08</sup> |
|  |                  |                                   | REACTOME_METABOLISM_OF_AMINO_ACIDS_AND_DERIVATIVES | 316  | 13 | 1.08x10 <sup>-07</sup> |
|  |                  |                                   | REACTOME_CELLULAR_RESPONSES_TO_STIMULI             | 688  | 18 | 3.22x10 <sup>-07</sup> |
|  | Oligodendrocytes | Chemical and Genetic perturbation | BLALOCK_ALZHEIMERS_DISEASE_DN                      | 1171 | 12 | 3.46x10 <sup>-08</sup> |
|  |                  | GO cellular component             | GOCC_NEURON_PROJECTION                             | 1241 | 11 | 7.10x10 <sup>-07</sup> |
|  |                  | Cell type signature               | MURARO_PANCREAS_BETA_CELL                          | 875  | 11 | 2.02x10 <sup>-08</sup> |

**Table S4: Several genes are differentially expressed in medial amygdala cell types in both chronic pain and migraine. P\_bonf = Bonferroni-corrected p value, Z = DEG regression beta value divided by DEG regression standard error.**

| Cell        | Gene     | Chronic pain |          |          | Migraine |          |          |
|-------------|----------|--------------|----------|----------|----------|----------|----------|
|             |          | Z            | P        | P_bonf   | Z        | P        | P_bonf   |
| Endothelial | GLUD1P3  | 6.98         | 3.48E-11 | 6.50E-07 | 4.94     | 1.51E-06 | 2.83E-02 |
|             | KDM4B    | 5.95         | 1.06E-08 | 1.97E-04 | 4.91     | 1.69E-06 | 3.15E-02 |
|             | LIFR     | -4.9         | 1.86E-06 | 3.47E-02 | -5.92    | 1.14E-08 | 2.13E-04 |
|             | NRBF2    | -4.95        | 1.49E-06 | 2.79E-02 | -6.09    | 4.48E-09 | 8.36E-05 |
|             | TNFRSF6B | 5.18         | 4.92E-07 | 9.19E-03 | 4.89     | 1.85E-06 | 3.47E-02 |
| Microglia   | CEBPD    | 5.21         | 4.14E-07 | 7.73E-03 | 5.19     | 4.52E-07 | 8.45E-03 |
|             | MBNL1    | 5.18         | 4.86E-07 | 9.07E-03 | 5.15     | 5.61E-07 | 1.05E-02 |
|             | MRPL39   | 4.89         | 1.87E-06 | 3.49E-02 | 5.19     | 4.63E-07 | 8.65E-03 |
|             | RBM22    | -5.1         | 6.96E-07 | 1.30E-02 | 4.98     | 1.25E-06 | 2.34E-02 |
|             | RPL24    | -5.21        | 4.19E-07 | 7.83E-03 | 4.83     | 2.53E-06 | 4.74E-02 |
|             | RPL27    | -5.52        | 9.31E-08 | 1.74E-03 | 4.9      | 1.80E-06 | 3.37E-02 |
|             | RRBP1    | 5.04         | 9.28E-07 | 1.73E-02 | 6.31     | 1.40E-09 | 2.61E-05 |

**Table S5: Overlap in migraine and chronic pain DEGs is primarily driven by medial amygdala endothelial cells. P = hypergeometric test p value.**

| Region | Cell type        | N DEG overlap | p     |
|--------|------------------|---------------|-------|
| dACC   | Astrocytes       | 0             | 1     |
|        | Endothelial      | 0             | 1     |
|        | ExN              | 0             | 1     |
|        | InN              | 0             | 1     |
|        | Microglia        | 0             | 1     |
|        | Oligodendrocytes | 0             | 1     |
| DLPFC  | Astrocytes       | 0             | 1     |
|        | Endothelial      | 0             | 1     |
|        | ExN              | 0             | 1     |
|        | InN              | 0             | 1     |
|        | Microglia        | 0             | 1     |
|        | Oligodendrocytes | 0             | 1     |
| BLA    | Astrocytes       | 0             | 1     |
|        | Endothelial      | 0             | 1     |
|        | ExN              | 0             | 1     |
|        | InN              | 0             | 1     |
|        | Microglia        | 0             | 1     |
|        | Oligodendrocytes | 0             | 1     |
| MeA    | Astrocytes       | 0             | 1     |
|        | Endothelial      | 5             | 0.022 |
|        | ExN              | 0             | 1     |
|        | InN              | 0             | 1     |
|        | Microglia        | 7             | 0.16  |
|        | Oligodendrocytes | 0             | 1     |

**Table S6: Several genes are differentially expressed in amygdala cell types in both chronic pain and lifetime oxymorphone use. P\_bonf = Bonferroni-corrected p value, Z = DEG regression beta value divided by DEG regression standard error.**

| Region | Cell        | Gene     | Chronic pain |          |          | Oxymorphone |          |          |
|--------|-------------|----------|--------------|----------|----------|-------------|----------|----------|
|        |             |          | Z            | P        | P_bonf   | Z           | P        | P_bonf   |
| BLA    | Endothelial | GADD45B  | 4.87         | 1.95E-06 | 0.03637  | 6.3         | 1.51E-09 | 2.82E-05 |
|        |             | YBX3     | 4.81         | 2.63E-06 | 0.049103 | 6.15        | 3.42E-09 | 6.40E-05 |
|        | Microglia   | CCL2     | 5.7          | 3.49E-08 | 0.000652 | 4.92        | 1.76E-06 | 3.30E-02 |
|        |             | RASSF10  | -5.36        | 2.02E-07 | 0.003779 | -4.98       | 1.38E-06 | 2.59E-02 |
|        |             | SERPINA3 | 5.21         | 4.06E-07 | 0.007581 | 4.95        | 1.55E-06 | 2.90E-02 |
| MeA    | Endothelial | FAM20C   | 5.24         | 3.77E-07 | 0.007041 | 4.95        | 1.44E-06 | 2.68E-02 |
|        |             | HILPDA   | 5.26         | 3.35E-07 | 0.006261 | 4.87        | 2.09E-06 | 3.91E-02 |
|        |             | KRBA1    | 5.35         | 2.22E-07 | 0.004151 | 5.15        | 5.65E-07 | 1.06E-02 |
|        |             | LOXL2    | 4.83         | 2.57E-06 | 0.047982 | 4.95        | 1.42E-06 | 2.66E-02 |
|        | Microglia   | FZD8     | -5.55        | 7.80E-08 | 0.001457 | -4.94       | 1.52E-06 | 2.84E-02 |
|        |             | RPL27    | -5.52        | 9.31E-08 | 0.001739 | -4.99       | 1.17E-06 | 2.19E-02 |
|        |             | RPL31    | -6           | 7.44E-09 | 0.000139 | -4.91       | 1.75E-06 | 3.27E-02 |
|        |             | RPS21    | -5.68        | 3.98E-08 | 0.000744 | -5.49       | 1.05E-07 | 1.97E-03 |

**Table S7: Overlap in lifetime oxymorphone use and chronic pain DEGs is primarily driven by amygdala endothelial cells. P = hypergeometric test p value.**

| Region | Region and cell type | N DEG overlap | p                   |
|--------|----------------------|---------------|---------------------|
| dACC   | Astrocytes           | 0             | 1                   |
|        | Endothelial          | 0             | 1                   |
|        | ExN                  | 0             | 1                   |
|        | InN                  | 0             | 1                   |
|        | Microglia            | 0             | 1                   |
|        | Oligodendrocytes     | 0             | 1                   |
| DLPFC  | Astrocytes           | 0             | 1                   |
|        | Endothelial          | 0             | 1                   |
|        | ExN                  | 0             | 1                   |
|        | InN                  | 0             | 1                   |
|        | Microglia            | 0             | 1                   |
|        | Oligodendrocytes     | 0             | 1                   |
| BLA    | Astrocytes           | 0             | 1                   |
|        | Endothelial          | 2             | $9 \times 10^{-04}$ |
|        | ExN                  | 0             | 1                   |
|        | InN                  | 0             | 1                   |
|        | Microglia            | 3             | $8 \times 10^{-03}$ |
|        | Oligodendrocytes     | 0             | 1                   |
| MeA    | Astrocytes           | 0             | 1                   |
|        | Endothelial          | 4             | $2 \times 10^{-04}$ |
|        | ExN                  | 0             | 1                   |
|        | InN                  | 0             | 1                   |
|        | Microglia            | 4             | $7 \times 10^{-03}$ |
|        | Oligodendrocytes     | 0             | 1                   |

**Table S8: Genes differentially expressed in lifetime fentanyl use.** pBonferroni = Bonferroni-corrected p value, Z = DEG regression beta value divided by DEG regression standard error. ExN = excitatory neuron, InN = inhibitory neuron.

| Region | cell        | Gene      | p                      | pBonferroni             | Z      |
|--------|-------------|-----------|------------------------|-------------------------|--------|
| dACC   | Endothelial | PIK3R5    | 1.07x10 <sup>-06</sup> | 0.0200                  | -5     |
|        | ExN         | PIK3R5    | 4.21x10 <sup>-07</sup> | 7.88x10 <sup>-03</sup>  | -5.195 |
|        | InN         | PIK3R5    | 1.97x10 <sup>-06</sup> | 0.0367                  | -4.876 |
| BLA    | Endothelial | EXTL3     | 1.53x10 <sup>-06</sup> | 0.0286                  | 4.935  |
|        |             | PHLPP2    | 1.87x10 <sup>-06</sup> | 0.0350                  | 4.892  |
|        |             | GSK3B     | 2.41x10 <sup>-06</sup> | 0.0451                  | 4.836  |
|        |             | NUP50     | 9.66x10 <sup>-07</sup> | 0.0181                  | 5.033  |
|        |             | MS4A4A    | 8.41x10 <sup>-07</sup> | 0.0157                  | -5.063 |
|        |             | ASTN1     | 1.66x10 <sup>-06</sup> | 0.0311                  | 4.917  |
|        |             | GENE      | 4.83x10 <sup>-07</sup> | 9.03 x10 <sup>-03</sup> | 5.179  |
|        |             | HPGDS     | 8.35x10 <sup>-07</sup> | 0.0156                  | -5.064 |
|        |             | TCEAL7    | 2.32x10 <sup>-07</sup> | 4.32 x10 <sup>-03</sup> | -5.331 |
|        |             | CDRT15    | 6.43x10 <sup>-08</sup> | 1.20 x10 <sup>-03</sup> | -5.588 |
|        | ExN         | ZNF806    | 5.03x10 <sup>-07</sup> | 9.39 x10 <sup>-03</sup> | -5.164 |
|        |             | YWHAQ     | 8.70x10 <sup>-07</sup> | 0.0163                  | -5.049 |
|        |             | AKAP17A   | 1.68x10 <sup>-07</sup> | 3.13 x10 <sup>-03</sup> | -5.389 |
| MeA    | Astrocytes  | LINC00863 | 5.16x10 <sup>-07</sup> | 9.64 x10 <sup>-03</sup> | -5.213 |



## References

1. Newman, A. M. *et al.* Determining cell type abundance and expression from bulk tissues with digital cytometry. *Nat. Biotechnol.* **37**, 773–782 (2019).
2. Barrett, T. *et al.* NCBI GEO: archive for functional genomics data sets—update. *Nucleic Acids Res.* **41**, D991–D995 (2013).
3. Yu, B. *et al.* Molecular and cellular evolution of the amygdala across species analyzed by single-nucleus transcriptome profiling. *Cell Discov.* **9**, 1–22 (2023).
4. Satija, R., Farrell, J. A., Gennert, D., Schier, A. F. & Regev, A. Spatial reconstruction of single-cell gene expression data. *Nat. Biotechnol.* **33**, 495–502 (2015).
5. Smedley, D. *et al.* BioMart – biological queries made easy. *BMC Genomics* **10**, 22 (2009).
6. Liberzon, A. *et al.* The Molecular Signatures Database (MSigDB) hallmark gene set collection. *Cell Syst.* **1**, 417–425 (2015).
